# Supplementary material for: Caspase-dependent and -independent lipotoxic cell-death pathways in fission yeast
Source: Oxford University Press journal article supplement (doi:10.1242/jcs.028977), 2008-07-25
Supplement: jcs028977-sup-028977-tables1.pdf [file jcs028977-sup-028977-tables1.pdf]

**Table S1. Strains used in this study**

| Strain/designation                  | Isogenic wild-type/<br>parental strains | Genotype                                                                                                                                                               | Source                      |
|-------------------------------------|-----------------------------------------|------------------------------------------------------------------------------------------------------------------------------------------------------------------------|-----------------------------|
| MBY266/Wild Type                    | -                                       | <i>h+</i> , <i>his3-D1</i> , <i>ade6-M210</i> , <i>leu1-32</i> , <i>ura4-D18</i>                                                                                       | (Zhang et al., 2003)        |
| MBY257/Wild Type                    | -                                       | <i>h-</i> , <i>his3-D1</i> , <i>ade6-M210</i> , <i>leu1-32</i> , <i>ura4-D18</i>                                                                                       | (Zhang et al., 2003)        |
| MBY192/Wild Type                    | -                                       | <i>h-</i> , <i>leu1-32</i> , <i>ura4-D18</i>                                                                                                                           | (Naqvi et al., 1999)        |
| YNB291/Nup124p-GFP                  | -                                       | <i>h+</i> , <i>Nup124::GFP::ura4<sup>+</sup></i>                                                                                                                       | (Balasundaram et al., 1999) |
| <i>Δplh1Δdgal</i> /DKO (1)          | MBY266                                  | <i>h+</i> , <i>his3-D1</i> , <i>ade6-M210</i> , <i>leu1-32</i> , <i>ura4-D18</i> , <i>plh1::his3<sup>+</sup></i> , <i>dgal::ura4<sup>+</sup></i>                       | (Zhang et al., 2003)        |
| <i>Δplh1Δdgal</i> /DKO (2)          | MBY257                                  | <i>h-</i> , <i>his3-D1</i> , <i>ade6-M210</i> , <i>leu1-32</i> , <i>ura4-D18</i> , <i>plh1::his3<sup>+</sup></i> , <i>dgal::ura4<sup>+</sup></i>                       | (Zhang et al., 2003)        |
| <i>Δplh1Δdgal</i> /DKO (3)          | MBY266                                  | <i>h+</i> , <i>his3-D1</i> , <i>ade6-M210</i> , <i>leu1-32</i> , <i>ura4-D18</i> , <i>plh1::his3<sup>+</sup></i> , <i>dgal::kanMX4</i>                                 | Generated in this study     |
| <i>Δplh1Δdgal</i> /DKO (4)          | MBY257                                  | <i>h-</i> , <i>his3-D1</i> , <i>ade6-M210</i> , <i>leu1-32</i> , <i>ura4-D18</i> , <i>plh1::his3<sup>+</sup></i> , <i>dgal::kanMX4</i>                                 | Generated in this study     |
| <i>Δplh1Δdgal</i> /DKO Nup124p-GFP  | DKO (4) x YNB291                        | <i>his3?</i> , <i>ade6?</i> , <i>leu1?</i> , <i>ura4?</i> , <i>plh1::his3<sup>+</sup></i> , <i>dgal::kanMX4</i> , <i>Nup124::GFP::ura4<sup>+</sup></i>                 | Generated in this study     |
| <i>Δplh1Δdgal_pca1_pca1</i> TKO (1) | MBY266                                  | <i>h+</i> , <i>his3-D1</i> , <i>ade6-M210</i> , <i>leu1-32</i> , <i>ura4-D18</i> , <i>plh1::his3<sup>+</sup></i> , <i>dgal::ura4<sup>+</sup></i> <i>pca::kanMX4</i>    | (Zhang et al., 2003)        |
| <i>Δplh1Δdgal_aif1_aif1</i> TKO     | MBY266                                  | <i>h+</i> , <i>his3-D1</i> , <i>ade6-M210</i> , <i>leu1-32</i> , <i>ura4-D18</i> , <i>plh1::his3<sup>+</sup></i> , <i>dgal::ura4<sup>+</sup></i> <i>aif1::kanMX4</i>   | Generated in this study     |
| <i>Δplh1Δdgal_rad9_rad9</i> TKO     | MBY266 and MBY257                       | <i>h+/-</i> , <i>his3-D1</i> , <i>ade6-M210</i> , <i>leu1-32</i> , <i>ura4-D18</i> , <i>plh1::his3<sup>+</sup></i> , <i>dgal::kanMX4</i> <i>rad9::ura4<sup>+</sup></i> | Generated in this study     |
| <i>Δplh1Δdgal_rad9_apg6</i> TKO     | MBY266 and MBY257                       | <i>h+/-</i> , <i>his3-D1</i> , <i>ade6-M210</i> , <i>leu1-32</i> , <i>ura4-D18</i> , <i>plh1::his3<sup>+</sup></i> , <i>dgal::kanMX4</i> <i>apg6::ura4<sup>+</sup></i> | Generated in this study     |
| <i>Δplh1Δdgal_pck1_pck1</i> TKO     | MBY266 and MBY257                       | <i>h+/-</i> , <i>his3-D1</i> , <i>ade6-M210</i> , <i>leu1-32</i> , <i>ura4-D18</i> , <i>plh1::his3<sup>+</sup></i> , <i>dgal::kanMX4</i> <i>pck1::ura4<sup>+</sup></i> | Generated in this study     |
| <i>Δplh1Δdgal_pck2_pck2</i> TKO     | MBY266 and MBY257                       | <i>h+/-</i> , <i>his3-D1</i> , <i>ade6-M210</i> , <i>leu1-32</i> , <i>ura4-D18</i> , <i>plh1::his3<sup>+</sup></i> , <i>dgal::kanMX4</i> <i>pck2::ura4<sup>+</sup></i> | Generated in this study     |
| <i>Δplh1Δdgal_bzz1_bzz1</i> TKO     | MBY266 and MBY257                       | <i>h+/-</i> , <i>his3-D1</i> , <i>ade6-M210</i> , <i>leu1-32</i> , <i>ura4-D18</i> , <i>plh1::his3<sup>+</sup></i> , <i>dgal::kanMX4</i> <i>bzz1::ura4<sup>+</sup></i> | Generated in this study     |
| <i>_pca1</i> (1)                    | MBY266                                  | <i>h+</i> , <i>his3-D1</i> , <i>ade6-M210</i> , <i>leu1-32</i> , <i>ura4-D18</i> , <i>pca::kanMX4</i>                                                                  | Generated in this study     |
| <i>_pca1</i> (2)                    | MBY192                                  | <i>h-</i> , <i>leu1-32</i> , <i>ura4-D18</i> , <i>pca1::kanMX4</i>                                                                                                     | Generated in this study     |
| <i>Δplh1Δdgal</i> /DKO (4)          | DKO (1) x <i>_pca1</i> (2)              | <i>his3?</i> , <i>ade6?</i> , <i>leu1-32</i> , <i>ura4-D18</i> , <i>plh1::his3<sup>+</sup></i> , <i>dgal::ura4<sup>+</sup></i>                                         | Generated in this study     |
| <i>Δplh1Δdgal_pca1_pca1</i> TKO (2) | DKO (1) x <i>_pca1</i> (2)              | <i>his3?</i> , <i>ade6?</i> , <i>leu1-32</i> , <i>ura4-D18</i> , <i>plh1::his3<sup>+</sup></i> , <i>dgal::ura4<sup>+</sup></i> , <i>pca::kanMX4</i>                    | Generated in this study     |
