# Supplementary material for: Caspase-dependent and -independent lipotoxic cell-death pathways in fission yeast
Source: Oxford University Press journal article supplement (doi:10.1242/jcs.028977), 2008-07-25
Supplement: jcs028977-sup-028977-tables2.pdf [file jcs028977-sup-028977-tables2.pdf]

**Table S2. Primers for the generation of gene replacement cassettes**

| Target gene              | Primers | Sequence                                   | Plasmid                               |
|--------------------------|---------|--------------------------------------------|---------------------------------------|
| <i>pca1</i> <sup>+</sup> | Pca1-15 | 5'-ATAAGAATGCGGCCGCGGAAGAAGCTTTGACACGTT-3' | pFA6akanMX4                           |
|                          | Pca1-13 | 5'-GCTCTAGAGGAAGTTGGATAGTGCTT-3'           |                                       |
|                          | Pca1-25 | 5'-CCATCGATGTAGTTCCATCAGATATT-3'           |                                       |
|                          | Pca1-23 | 5'-CCGCTCGAGGGTAGGTAGTATAGTTAGA-3'         |                                       |
| <i>aif1</i> <sup>+</sup> | Aif1-15 | 5'-ACGCAGCTGCTCTCAAATGTGTATAAAGGT-3'       | pFA6akanMX4                           |
|                          | Aif1-13 | 5'-GAAGATCTTCGCAACAACATGGTCCTG-3'          |                                       |
|                          | Aif1-25 | 5'-ACCAGAATTCTGTATCGTA-3'                  |                                       |
|                          | Aif1-23 | 5'-GGACTAGTTCATGGATGTAGCGACTT-3'           |                                       |
| <i>rad9</i> <sup>+</sup> | Rad9-15 | 5'-TCCCCGCGGGGCATTTCGCGGATTTTGG-3'         | pBlueScript- <i>ura4</i> <sup>+</sup> |
|                          | Rad9-13 | 5'-CGGAATTCTTTATATAACCAGTACGTGA-3'         |                                       |
|                          | Rad9-25 | 5'-CCATCGATTAGGAAAATCCTTCTTTGC-3'          |                                       |
|                          | Rad9-23 | 5'-CCCTCGAGCTCATTATAAACGTGGCT-3'           |                                       |
| <i>apg6</i> <sup>+</sup> | Apg6-15 | 5'-TCCCCGCGGGGCGTGCTTTATTTACATT-3'         | pBlueScript- <i>ura4</i> <sup>+</sup> |
|                          | Apg6-13 | 5'-GCGGATCCGCCTTCGTATTGACATGAG-3'          |                                       |
|                          | Apg6-25 | 5'-CCATCGATTAATCCTTAATTTCCATT-3'           |                                       |
|                          | Apg6-23 | 5'-GTAAACAACCTGATCTCGAG-3'                 |                                       |
| <i>pck1</i> <sup>+</sup> | Pck1-15 | 5'-TCCCCGCGGTCCCTATAATTGCACATTC-3'         | pBlueScript- <i>ura4</i> <sup>+</sup> |
|                          | Pck1-13 | 5'-GCGGATCCAAACAAGGAAGACCACTGC-3'          |                                       |
|                          | Pck1-25 | 5'-CCGCTCGAGAGTGTACTCACCTTTACA-3'          |                                       |
|                          | Pck1-23 | 5'-GGGGTACCCGTTTCGCAACTGTGTAGAT-3'         |                                       |
| <i>pck2</i> <sup>+</sup> | Pck2-15 | 5'-TCCCCGCGGTTTCACAGACCATCCTGTGT-3'        | pBlueScript- <i>ura4</i> <sup>+</sup> |
|                          | Pck2-13 | 5'-CGGGATCCTCCGCTTAACTTCTTATCT-3'          |                                       |
|                          | Pck2-25 | 5'-CCGCTCGAGGAGCATAAAGTTACTCTCA-3'         |                                       |
|                          | Pck2-23 | 5'-CGGGTACCGCGTCGTCAAACGCACTCT-3'          |                                       |
| <i>bzz1</i> <sup>+</sup> | Bzz1-15 | 5'-TGACTCTAGATGGTCATTA-3'                  | pBlueScript- <i>ura4</i> <sup>+</sup> |
|                          | Bzz1-13 | 5'-GCGAATTCCCCTACAATGTAGTTGGT-3'           |                                       |
|                          | Bzz1-25 | 5'-GGATCGATAGTTTGACGGAAGAAATTG-3'          |                                       |
|                          | Bzz1-23 | 5'-GCCTCGAGAGAGGTGAGTTTGGATCAG-3'          |                                       |
