# Supplementary material for: Caspase-dependent and -independent lipotoxic cell-death pathways in fission yeast
Source: Oxford University Press journal article supplement (doi:10.1242/jcs.028977), 2008-07-25
Supplement: jcs028977-sup-028977-tables3.pdf [file jcs028977-sup-028977-tables3.pdf]

**Table S3. Primers for PCR identification of deletion mutants**

| Target gene              | Primer designation     | Sequence                              |
|--------------------------|------------------------|---------------------------------------|
| <i>dga1</i> <sup>+</sup> | Dga1kc5 <sup>a</sup>   | 5'-CGATAGTAGTCAATACCAG-3'             |
|                          | KanI5 <sup>b</sup>     | 5'-AATCAAATGTTAGCGTGAT-3'             |
| <i>pca1</i> <sup>+</sup> | Dga1I3 <sup>c</sup>    | 5'-GCAATTTCGAATCGCGATAC-3'            |
|                          | Pca1kc3 <sup>a</sup>   | 5'-GTGGTTAGGCAATAAAGC-3'              |
|                          | KanI3 <sup>b</sup>     | 5'-ACCTCAGTGGCAAATCCTA-3'             |
|                          | PomYCA1-5 <sup>d</sup> | 5'-GGAATTCCATATGAGCTACAACCTCCAATCC-3' |
| <i>aif1</i> <sup>+</sup> | PomYCA1-3 <sup>e</sup> | 5'-GCGGATCCCTATAAAACCATGGCAAGA-3'     |
|                          | Aif1kc5 <sup>a</sup>   | 5'-AGAGTAGACATTGTGTATG-3'             |
|                          | KanI3 <sup>b</sup>     | 5'-ACCTCAGTGGCAAATCCTA-3'             |
|                          | Aif1I3 <sup>c</sup>    | 5'-GTGTTTCGAGCACGAACTAG-3'            |
| <i>rad9</i> <sup>+</sup> | Rad9kc5 <sup>a</sup>   | 5'-GGTGCATGATTATTTTAC-3'              |
|                          | Ura4I5 <sup>b</sup>    | 5' GCTCCTACAACATTACCAC-3'             |
|                          | Rad9I3 <sup>c</sup>    | 5'-ACAGGACGGAATAAGGATG-3'             |
| <i>apg6</i> <sup>+</sup> | Apg6kc5 <sup>a</sup>   | 5'-GGAAATGTTTACCAGTTTG-3'             |
|                          | Ura4I5 <sup>b</sup>    | 5' GCTCCTACAACATTACCAC-3'             |
|                          | Apg6I3 <sup>c</sup>    | 5'-GAATGACACCTCTGACACA-3'             |
| <i>pck1</i> <sup>+</sup> | Pck1kc5 <sup>a</sup>   | 5'-GTACTATGAGGAGATTGCA-3'             |
|                          | Ura4I5 <sup>b</sup>    | 5' GCTCCTACAACATTACCAC-3'             |
|                          | Pck1I3 <sup>c</sup>    | 5'-GACTCTTCCCGTTCTACTT-3'             |
| <i>pck2</i> <sup>+</sup> | Pck2kc5 <sup>a</sup>   | 5'-CTAATAGTTTAGCAAGCA-3'              |
|                          | Ura4I5 <sup>b</sup>    | 5' GCTCCTACAACATTACCAC-3'             |
|                          | Pck2I3 <sup>c</sup>    | 5'-AGGGCGCCATGAATAACTG-3'             |
| <i>bzz1</i> <sup>+</sup> | Bzz1kc3 <sup>a</sup>   | 5'-TTCGGGCTTGAGCTCCAAC-3'             |
|                          | Ura4I3 <sup>b</sup>    | 5'-GAGAAAGAATGCTGAGTAG-3'             |
|                          | Bzz1I5 <sup>c</sup>    | 5'-CTTCAAGCCATTTGCGCGG-3'             |

<sup>a</sup> Forward primers for positive and negative PCR, located ~550bp upstream of the coding regions.

<sup>b</sup> Reverse primers for positive PCR, located within the respective markers.

<sup>c</sup> Reverse primers for negative PCR, located within the respective coding regions.

<sup>d-e</sup> Primers for negative PCR checking of *pca1* disruption mutants.
